# Supplementary material for: A Rapidly Evolving Polybasic Motif Modulates Bacterial Detection by Guanylate Binding Proteins
Source: PubMed Central journal article supplement (PMC7240152; doi:10.1128/mbio.00340-20), 2020-05-19
Supplement: mBio.00340-20-sf002.pdf [file mBio.00340-20-sf002.pdf]

247

|                          |                      |   |          |
|--------------------------|----------------------|---|----------|
|                          | 228                  |   | 255      |
| Human                    | FPKRKCFVFDWPAPKKYLAH | H | LEQLKEEE |
| Bonobo                   | FPKRKCFVFDWPAPKKYLAH | H | LEQLKEEE |
| Chimpanzee               | FPKRKCFVFDWPAPKKYLAH | H | LEQLKEEE |
| Western Lowland Gorilla  | FPKRKCFVFDWPAPKKYLAH | H | LEQLKEEE |
| Sumatran Orangutan       | FPKRKCFVFDWPAPRKYLAH | H | LEQLKEEE |
| Sooty Mangabey           | FPNRKCFIFDWPAQKKYLAH | H | LEQLKEEE |
| Drill                    | FPNRKCFIFDWPAQ-KYLAR | R | LEQLKEEE |
| Baboon                   | FPNRKCFIFDWPAHKKYLAR | R | LEQLKEEE |
| Rhesus Macaque           | FPNRKCFIFDWPAQKKYLAR | R | LEQLKEEE |
| Crab-Eating Macaque      | FPNRKCFIFDWPAQKKYLAR | R | LEQLKEEE |
| Pigtailed Macaque        | FPNRKCFIFDWPAQKKYLAR | R | LEQLKEEE |
| African Green Monkey     | FPNRKCFIFDCPAQKKYLAR | R | LEQLKEEE |
| Patas Monkey             | FPNRKCFIFDCPAQKKYLAR | R | LEQLKEEE |
| Colobus                  | FPNRKCFIFDWPAQKKYLAR | R | LEQLKEEE |
| Brown-Headed Tamarin     | FPKRKCFIFDRPARTKYLA  | C | LEQLKEED |
| Common Marmoset          | FPKRKCFVFDPRARGKYLPH | H | LEQLKEED |
| Ma's Night Monkey        | FPKRKCFTFDRPTRRKYLAH | H | LEQLKEED |
| Capuchin Monkey          | FPKRKCFIFDRPARRKYLAH | H | LEQLKEED |
| Bolivian Squirrel Monkey | FPKRKCFIFEQPAQRTLLAR | R | LEQLKEED |
| Saki Monkey              | FPKRKCFIFDRPARRKYLA  | C | LEQLKEED |
| Woolly Monkey            | FPKRKCFIFDRPAQRKYLAH | H | LEQLKEED |

\*\*:\*\*\*\* \*: \*: . \* . \*\*\*\*\*:

|                          |           |     |                                 |         |     |          |
|--------------------------|-----------|-----|---------------------------------|---------|-----|----------|
|                          | 541       | 550 |                                 | 582     | 585 | 591      |
| Human                    | MAEQEKTAL | LK  | LQEQERLLKEGFENESKRLQKDIWDIQMRS  | ----    | KSL | EPICNIL  |
| Bonobo                   | MAEQEKTAL | LK  | LQEQERLLKEGFENESKRLQKDIWDIQMRS  | ----    | KSL | EPICNIL  |
| Chimpanzee               | MAEQEKTAL | LK  | LQEQERLLKEGFENESKRLQKDIWDIQMRS  | ----    | KSL | EPICNIL  |
| Western Lowland Gorilla  | MAEQEKTAL | LK  | LQEQERLLKEGFENESKRLQKDIWDIQMRS  | ----    | KSL | EPICNIL  |
| Sumatran Orangutan       | MAEQEKTAL | LK  | LREQERLLKEGFENESKRLQKEIRDIQMRS  | ----    | KSL | HPICNIL  |
| Sooty Mangabey           | MAEQEKTAL | LK  | LQEQERLLKEGFKNESQRLQKEIRDIQMRS  | ----    | KSR | OPTCHIL  |
| Drill                    | MAEQEKTAL | LK  | LQEQERLLKEGFKNESQRLQKEIRDIQMRS  | ----    | KSR | OPTCHIL  |
| Baboon                   | MAEQEKTAL | LK  | LQEQERLLKEGFKNESQRLQKEIRDIQMRS  | ----    | KSR | OPTCHIL  |
| Rhesus Macaque           | MAEQEKTAL | LK  | LQEQERLLKEGFKNESQRLQKEIRDIQMRS  | ----    | KSQ | QPMCHIL  |
| Crab-Eating Macaque      | MAEQEKTAL | LK  | LQEQERLLKEGFKNESQRLQKEIRDIQMRS  | ----    | KSQ | QPMCHIL  |
| Pigtailed Macaque        | MAEQEKTAL | LK  | LQEQERLLKEGFKNESQRLQKEIRDIQMRS  | ----    | KSQ | QPMCHIL  |
| African Green Monkey     | MAEQEKTAL | LK  | LQEQERLLKEGFKNESQRIQKEIQDIQMRS  | ----    | KSQ | QPVCHIL  |
| Patas Monkey             | MAEQEKTAL | LK  | LQEQERLLKEGFKNESQRIQKEIRDIQMRS  | ----    | KSQ | QPMCHIL  |
| Colobus                  | MAEQEKTAL | LK  | LQEQERLLKEGFKNESQRLQKEIRDIQMRS  | ----    | TSR | ELMCHIL  |
| Brown-Headed Tamarin     | MAEQEKIIN | V   | KFKEQELLLKEGFENESNRLRKEIRDIQIRD | ----    | RPS | GPICNIL  |
| Common Marmoset          | MAEQEKTIT | C   | KLKEQELLLKEGFQNESKRLQKEIQDIQMR  | ----    | RSS | NSTCNIL  |
| Ma's Night Monkey        | MAEQEKTIN | L   | KLKEQERLLKEGFENESKRLQKEIRDIQMG  | ----    | VSS | GPTCNIL  |
| Capuchin Monkey          | MAEQEKTIN | L   | KLKEQERLLKEGFENESKRLQKEIRDIQMR  | RRVDHEV | KRS | RPSWSTW  |
| Bolivian Squirrel Monkey | IAEQEKTID | V   | KLKEQERLLKEGFELSKRLQKEIQDIKRR   | ----    | RS  | ---SCNIL |
| Saki Monkey              | MAEQEMTIN | L   | KLKEQERLLKEGFENESKRLQKEIRDIQMR  | ----    | VSS | GPTCNIL  |
| Woolly Monkey            | MAEQEKTIN | L   | KLKEQERLLKEGFKNESKRLQKEIEDIQMR  | ----    | VLS | GPTCNIL  |

:\*\*\*\* : \*: .\*\* \*\*\*\*\*: \*\*:\*.\* \*\*:
