# Supplementary material for: A Rapidly Evolving Polybasic Motif Modulates Bacterial Detection by Guanylate Binding Proteins
Source: PubMed Central journal article supplement (PMC7240152; doi:10.1128/mbio.00340-20), 2020-05-19

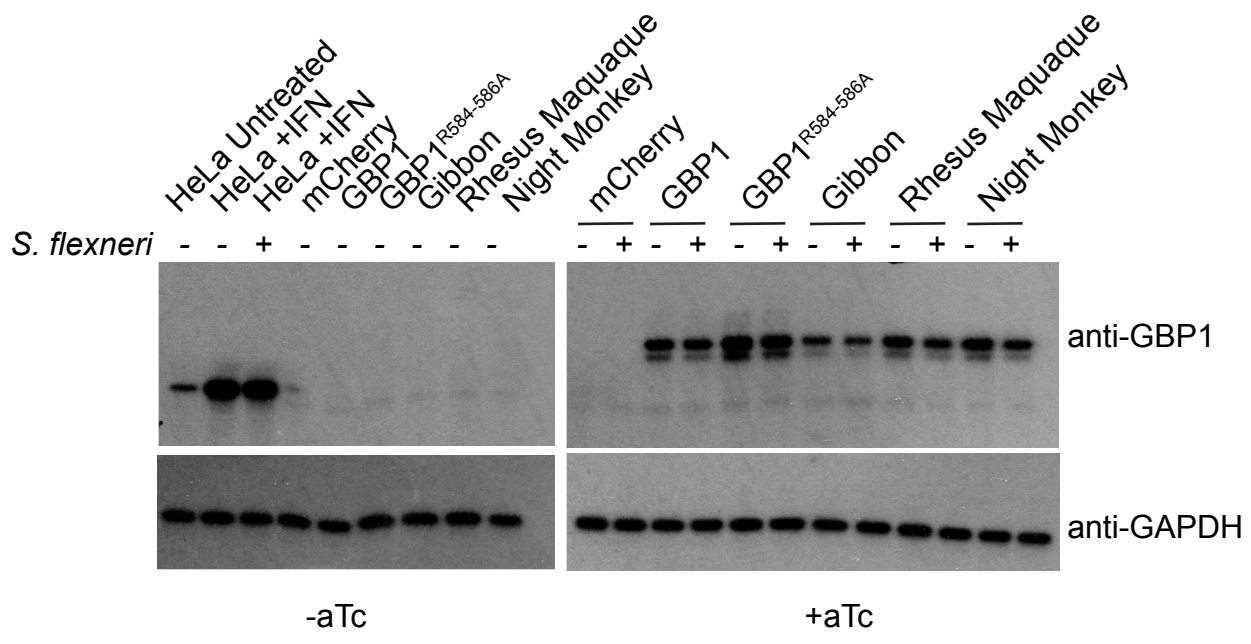

Supplement: mBio.00340-20-sf004.pdf [file mBio.00340-20-sf004.pdf]
