# Supplementary material for: A Rapidly Evolving Polybasic Motif Modulates Bacterial Detection by Guanylate Binding Proteins
Source: PubMed Central journal article supplement (PMC7240152; doi:10.1128/mbio.00340-20), 2020-05-19
Supplement: mBio.00340-20-st003.pdf [file mBio.00340-20-st003.pdf]

**Table S3.** GBP2 whole gene log likelihood scores and parameter estimates for four models of variable  $\omega$  among sites assuming the f3X4 model of codon frequencies in PAML.

| Site Model                                            | Parameter Estimates                                                                                                                                       | Sites* with $\omega^{**}>1$                                                                                                               | InL      |
|-------------------------------------------------------|-----------------------------------------------------------------------------------------------------------------------------------------------------------|-------------------------------------------------------------------------------------------------------------------------------------------|----------|
| <b>M1: Neutral</b>                                    | ( $\omega_0=0$ ) $f_0=0.735$<br>( $\omega_1=1$ ) $f_1=0.265$<br>branch $\omega$ (mean)=0.293                                                              | Not allowed                                                                                                                               | -5061.10 |
| <b>M2: Selection</b>                                  | ( $\omega_0=0$ ) $f_0=0.732$<br>( $\omega_1=1$ ) $f_1=0.248$<br><b>(<math>\omega_2=6.6</math>) <math>f_2=0.021</math></b><br>branch $\omega$ (mean)=0.421 | <b>247 H 0.993</b><br>575 W 0.976<br><b>582 K 0.999</b><br><b>585 E 1.000</b><br>587 I 0.975                                              | -5037.85 |
| <b>M7: <math>\beta</math></b>                         | $p=0.01204$ $q=0.02377$<br>branch $\omega$ (mean)=0.314                                                                                                   | Not allowed                                                                                                                               | -5061.77 |
| <b>M8: <math>\beta</math> and <math>\omega</math></b> | $p=0.07563$ $q=0.18279$<br>$f_0=0.97860$<br><b><math>\omega_1=6.5</math> (<math>f_1=0.0214</math>)</b><br>branch $\omega$ (mean)=0.426                    | 241 P 0.969<br><b>247 H 0.997</b><br>575 W 0.991<br><b>582 K 0.999</b><br>583 S 0.979<br>584 L 0.978<br><b>585 E 1.000</b><br>587 I 0.993 | -5038.30 |

\*posterior probabilities >0.95 by Bayes Empirical Bayes (BEB) analysis

\*\* $\omega=dN/dS$

\*\*\*Amino acid positions shown are for human GBP2.
