# Supplementary material for: A Rapidly Evolving Polybasic Motif Modulates Bacterial Detection by Guanylate Binding Proteins
Source: PubMed Central journal article supplement (PMC7240152; doi:10.1128/mbio.00340-20), 2020-05-19
Supplement: mBio.00340-20-st004.pdf [file mBio.00340-20-st004.pdf]

**Table S4A.** Summary of positive selection in primate GBP2 (MEME, FEL, SLAC).

| Model        | Sites with evidence of positive selection (p-value)* |
|--------------|------------------------------------------------------|
| MEME         | 208 K (0.04)                                         |
|              | 209 G (0.04)                                         |
|              | <b>247 H (0.03)</b>                                  |
|              | 296 L (0.01)                                         |
|              | 513 E (0.01)                                         |
|              | 565 N (0.02)                                         |
|              | <b>582 K (0.01)</b>                                  |
|              | <b>585 E (0.04)</b>                                  |
| 586 P (0.01) |                                                      |
| FEL          | <b>247 H (0.050)</b>                                 |
|              | <b>582 K (0.033)</b>                                 |
|              | <b>585 E (0.033)</b>                                 |
| SLAC         | No positively selected sites identified              |

**Table S4B.** Summary of positive selection in primate GBP2 using REL algorithm.

| Sites with evidence of diversifying selection* | Posterior probability $\beta > \alpha$ |
|------------------------------------------------|----------------------------------------|
| H247                                           | 0.98                                   |
| K582                                           | 0.98                                   |
| E585                                           | 0.99                                   |

**Table S4C.** Summary of positive selection in primate GBP2 using FUBAR algorithm.

| Sites with evidence of diversifying selection* | Posterior probability $\beta > \alpha$ |
|------------------------------------------------|----------------------------------------|
| M11                                            | 0.930                                  |
| N161                                           | 0.925                                  |
| E188                                           | 0.944                                  |
| F234                                           | 0.926                                  |
| A241                                           | 0.940                                  |
| <b>H247</b>                                    | <b>0.984</b>                           |
| E327                                           | 0.939                                  |
| E334                                           | 0.924                                  |
| G338                                           | 0.999                                  |
| A549                                           | 0.909                                  |
| <b>L550</b>                                    | <b>0.936</b>                           |
| E564                                           | 0.905                                  |
| <b>K582</b>                                    | <b>0.989</b>                           |
| <b>E585</b>                                    | <b>0.992</b>                           |

\*Amino acid positions shown are for human GBP2.
