# Supplementary material for: A Rapidly Evolving Polybasic Motif Modulates Bacterial Detection by Guanylate Binding Proteins
Source: PubMed Central journal article supplement (PMC7240152; doi:10.1128/mbio.00340-20), 2020-05-19
Supplement: mBio.00340-20-st005.pdf [file mBio.00340-20-st005.pdf]

**Table S5. Oligonucleotides used in this study.**

| <b>Oligo Name</b>                      | <b>Sequence</b>                                                                                                                                                                                                                                                                                                                                                                                                 |
|----------------------------------------|-----------------------------------------------------------------------------------------------------------------------------------------------------------------------------------------------------------------------------------------------------------------------------------------------------------------------------------------------------------------------------------------------------------------|
| pmCherry-hGBP1DBgIII-F                 | 5'-GCTGTACAAGTCCGGACTCAGGTCCATGGCATCAGAGATC-3'                                                                                                                                                                                                                                                                                                                                                                  |
| pmCherry-hGBP1DBgIII-R                 | 5'-GATCTCTGATGCCATGGACCTGAGTCCGGACTTGTACAGC-3'                                                                                                                                                                                                                                                                                                                                                                  |
| attB1-mCherry-F                        | 5'-GGGGACAAGTTTGTACAAAAAAGCAGGCTGCCACCATGGTGTAGCAAGGGCGAGG-3'                                                                                                                                                                                                                                                                                                                                                   |
| attB2-hGBP1DC_BgIII-R                  | 5'-GGGGACCACTTTGTACAAGAAAGCTGGGTCTTAGAGATCTTGTATCTCATTTTTTCATT ATTCTGCTTTC-3'                                                                                                                                                                                                                                                                                                                                   |
| Gibbon_PBM-F                           | 5'-ATGAGATACAAGATCTCCAGGCCGAAAATGCGTCCGCGCCGTCCGTGTACCATAAGCTAA GATCTCTAAGACCCA-3'                                                                                                                                                                                                                                                                                                                              |
| Gibbon_PBM-R                           | 5'-TGGGTCTTAGAGATCTTAGCTTATGGTACACGGACGGCGCGGACGCATTTTCGCCTGGA GATCTTGTATCTCAT-3'                                                                                                                                                                                                                                                                                                                               |
| Rhesus Macaque_PB M-F                  | 5'-ATGAGATACAAGATCTCCAGAAGAAAATGCGTCAGCGCCGTACCTGTACCATAAGCTAA GATCTCTAAGACCCA-3'                                                                                                                                                                                                                                                                                                                               |
| Rhesus Macaque_PB M-R                  | 5'-TGGGTCTTAGAGATCTTAGCTTATGGTACAGGTACGGCGCTGACGCATTTTCTTCTGGA GATCTTGTATCTCAT-3'                                                                                                                                                                                                                                                                                                                               |
| Night Monkey_PB M-F                    | 5'-ATGAGATACAAGATCTCCAGAACGCGATGCGTCCGCGCGTCCGCGTGTACCATAAG CTAAGATCTCTAAGACCCA-3'                                                                                                                                                                                                                                                                                                                              |
| Night Monkey_PB M-R                    | 5'-TGGGTCTTAGAGATCTTAGCTTATGGTACAACGGCGACGCGCGGACGCATCGCGTTC TGGAGATCTTGTATCTCAT-3'                                                                                                                                                                                                                                                                                                                             |
| Capuchin_P BM-F                        | 5'-ATGAGATACAAGATCTCCAGAACGCCATGAAGCCCCCTCGGCGCAGATGTACCATAAG CTAAGATCTCTAAGACCCA-3'                                                                                                                                                                                                                                                                                                                            |
| Capuchin_P BM-R                        | 5'-TGGGTCTTAGAGATCTTAGCTTATGGTACATCTGCGCCGAGGGGGCTTCATGGCGTTC TGGAGATCTTGTATCTCAT-3'                                                                                                                                                                                                                                                                                                                            |
| Squirrel Monkey_PB M-F                 | 5'-ATGAGATACAAGATCTCCAGAACGCCATGAGACCCCGCAAGAGATGTACCATAAGCTAA GATCTCTAAGACCCA-3'                                                                                                                                                                                                                                                                                                                               |
| Squirrel Monkey_PB M-R                 | 5'-TGGGTCTTAGAGATCTTAGCTTATGGTACATCTCTTGCGGGGTCTCATGGCGTTCTGGAG ATCTTGTATCTCAT-3'                                                                                                                                                                                                                                                                                                                               |
| Marmoset_P BM-F                        | 5'-ATGAGATACAAGATCTCCAGAACGCCATGAAGAACGTGTTCTTCCCCCTGTCCCGGCGCT GTACCATAAGCTAAGATCTCTAAGACCCA-3'                                                                                                                                                                                                                                                                                                                |
| Marmoset_P BM-R                        | 5'-TGGGTCTTAGAGATCTTAGCTTATGGTACAGCGCCGGGACAGGGGAAGAACACGTTCTT CATGGCGTTCGGAGATCTTGTATCTCAT-3'                                                                                                                                                                                                                                                                                                                  |
| attB2-hGBP1-R                          | 5'-GGGGACCACTTTGTACAAGAAAGCTGGGTCTTAGCTTATGGTACATGCCTTTCGTC-3'                                                                                                                                                                                                                                                                                                                                                  |
| hGBP1_R58 5P-F                         | 5'-CAGACGAAAATGAGACCACGAAAGGCATGTACCATAAGC-3'                                                                                                                                                                                                                                                                                                                                                                   |
| hGBP1_R58 5P-R                         | 5'-GCTTATGGTACATGCCTTTCGTTGGTCTCATTTTCGTCTG-3'                                                                                                                                                                                                                                                                                                                                                                  |
| hGBP1_A58 8R-F                         | 5'-CAGACGAAAATGAGACGACGAAAGCGATGTACCATAAGC-3'                                                                                                                                                                                                                                                                                                                                                                   |
| hGBP1_A58 8R-R                         | 5'-GCTTATGGTACATGCCTTTCGTTGGTCTCATTTTCGTCTG-3'                                                                                                                                                                                                                                                                                                                                                                  |
| hGBP1_R58 5P_A588R-F                   | 5'-CTCCAGACGAAAATGAGACCACGAAAGCGATGTACCATAAGC-3'                                                                                                                                                                                                                                                                                                                                                                |
| hGBP1_R58 5P_A588R-R                   | 5'-GCTTATGGTACATGCCTTTCGTTGGTCTCATTTTCGTCTGGAG-3'                                                                                                                                                                                                                                                                                                                                                               |
| Squirrel Monkey GBP2 C-Terminus gBlock | 5'-<br>CTTCTACAACTGATCAGTCACTCTCAGAAAAGGAAAAAGCGCTTGAAGTGGAACGTGTAAAGGCTGAATCT<br>GCCGAAGCTGCAAAAGAAAATGTTGGAGGAAATACAAAAGAAGAACCAGCAGAT<br>GATGGAACAGAAAAGAGAAGAGTTATCAGGAACATGTGAAACAATTGACTGAGAAGATGGAGAG<br>TGATAGGGCCCAATTAATAGCGGAGCAAGAGAAGACCATCGATGTTAAACTTAAGGAACAGGAACGCCTTC<br>TCAAAGAGGGATTTCGAGCTTGAGAGCAAGAGACTTCAAAAAGAGATACAAGATATCA<br>AGAAAAGACGCAGATCATCATGTAACATACTCTAATGATCATAATCAGCCA-3' |
